# Supplementary material
Source: publisher figshare collection journal article supplement (https://karger.figshare.com/ndownloader/files/14569883)
Supplement: Supplementary file 1 [file 14569883]

| Supplementary Table 1. Summary of all raw data | | | |
| --- | --- | --- | --- |
| Variable | **EXTEND** | **Control** | ***p*** |
| GA at Cannulation (d) | 107 (105.5-107.0) | n/a | n/a |
| GA at End of Study (d) | 129 (128.3-132.8) | n/a | n/a |
| GA of Controls (d) | 129 (128.5-132.5) | n/a | n/a |
| Duration of Study (d) | 23 (21.3-26.3) | n/a | n/a |
| Oxygen Delivery (mL min-1 kg-1) | 24.3 (±1.0) | n/a | n/a |
| Umbilical Blood Flow (mL min-1 kg-1) | 186 (172-208) | n/a | n/a |
| Serum Total Bilirubin (mg dL-1) |  |  |  |
| Day 1 | 0.7 (0.5-0.9) | n/a | n/a |
| Week 1 | 1.1 (0.7-1.3) | n/a | n/a |
| Week 2 | 2.8 (2.0-3.7) | n/a | n/a |
| Week 3 | 6.6 (1.3-7.1) | n/a | n/a |
| Serum Direct Bilirubin (mg dL-1) |  |  |  |
| Day 1 | 0.3 (0.3-0.4) | n/a | n/a |
| Week 1 | 0.5 (0.5-0.7) | n/a | n/a |
| Week 2 | 1.3 (0.9-1.8) | n/a | n/a |
| Week 3 | 3.2 (0.8-4.3) | n/a | n/a |
| Serum 8-OHDG (ng mL-1) |  |  |  |
| Day 1 | 75.3 (64.3-80.6) | n/a | n/a |
| Week 1 | 48.1 (43.1-61.6) | n/a | n/a |
| Week 2 | 55.7 (47.2-69.1) | n/a | n/a |
| Week 3 | 46.0 (42.5-60.6) | n/a | n/a |
| Control | n/a | 86.7 (73.3-106.3) | n/a |
| Liver OCR (pmol min-1 μg-1 protein) |  |  |  |
| Basal | 23.1 (18.7-31.9) | 16.6 (13.1-18.9) | 0.0067 |
| Maximal | 90.6 (82.0-115.6) | 86.6 (78.0-100.7) | 0.7302 |
| Heart OCR (pmol min-1 μg-1 protein) |  |  |  |
| Basal | 59.8 (55.0-68.4) | 43.4 (34.6-65.6) | 0.1057 |
| Maximal | 547.3 (416.5-665.3) | 502.2 (410.1-605.3) | 0.5556 |
| Kidney OCR (pmol min-1 μg-1 protein) |  |  |  |
| Basal | 29.5 (18.5-39.7) | 19.0 (15.8-24.2) | 0.0831 |
| Maximal | 162.1 (134.7-176.8) | 149.7 (132.1-177.5) | 0.7302 |
| Skeletal Muscle OCR (pmol min-1 μg-1 protein) |  |  |  |
| Basal | 35.1 (29.4-38.9) | 30.9 (15.0-45.8) | 0.9591 |
| Maximal | 179.8 (167.1-189.7) | 179.5 (149.8-221.3) | 0.9999 |
| GA = gestational age; d = days; 8-OHDG = 8-hydroxy-2-desoxyguanosine; OCR = oxygen consumption rate; Data are expressed as mean (±SD) or median (IQR) as appropriate. | | | |
